# Supplementary material
Source: publisher figshare collection journal article supplement (https://acs.figshare.com/ndownloader/files/9039715)
Supplement: Supplementary file 1 [file 9039715]

---

# **Improved design and optimization for separating azeotropes with heavy component as distillate through energy-saving extractive distillation by varying pressure**

Xinqiang YOU<sup>a</sup>, Jinglian GU<sup>b</sup>, Changjun PENG<sup>a</sup>, Weifeng Shen<sup>b\*</sup>, Honglai LIU<sup>a\*</sup>

<sup>a</sup> State Key laboratory of Chemical Engineering, School of Chemistry and Molecular Engineering, East China University of Science and Technology, Shanghai 200237, China

<sup>b</sup> School of Chemistry and Chemical Engineering, Chongqing University, Chongqing 400044, China

\* E-mail addresses: [shenweifeng@cqu.edu.cn](mailto:shenweifeng@cqu.edu.cn) (W.F. Shen), [hlliu@ecust.edu.cn](mailto:hlliu@ecust.edu.cn) (H.L. Liu)

## 1 Process utility

**Table S1. Process utility**

| Name          | Pressure /MPa | Temperature /K | Price / \$/GJ |
|---------------|---------------|----------------|---------------|
| LP steam      | 0.5           | 433            | 7.72          |
| MP steam      | 1.0           | 457            | 8.22          |
| HP steam      | 1.5           | 527            | 9.88          |
| Cooling water | 0.1           | 298            | 0.278         |

**Table S2. Pressure correlation factor ( $F_p$ ) for column shell\***

|                |            |      |      |      |
|----------------|------------|------|------|------|
| Pressure / psi | Up to 50   | 100  | 200  | 300  |
| Pressure / atm | Up to 3.45 | 6.9  | 13.8 | 20.7 |
| $F_p$          | 1.00       | 1.05 | 1.15 | 1.20 |

\* Douglas, J. M. Conceptual Design of Chemical Processes; McGraw-Hill: New York, 1988.

**Table S3. Recovery, entrainer makeup and OF for design 1, design 16, and design A.**

|          | Mole fraction                              |           | Recovery | makeup entrainer kmol/h | OF kJ/kmol |
|----------|--------------------------------------------|-----------|----------|-------------------------|------------|
|          | D1 stream                                  | D2 stream |          |                         |            |
|          | Design 1 with D1=271.2 and D2=271.2 kmol/h |           |          |                         |            |
| Acetone  | 0.0010                                     | 0.9950    | 0.9994   | 2.4                     | 50165.9    |
| Methanol | 0.9950                                     | 0.0002    | 0.9994   |                         |            |
| water    | 0.0040                                     | 0.0048    |          |                         |            |
|          | Design 16 with D1=271 and D2=270.8 kmol/h  |           |          |                         |            |
| Acetone  | 0.001306                                   | 0.995739  | 0.9987   | 1.8                     | 33165.3    |
| Methanol | 0.995001                                   | 0.001310  | 0.9987   |                         |            |
| water    | 0.003694                                   | 0.002951  |          |                         |            |
|          | Design A with D1=271 and D2=270.8 kmol/h   |           |          |                         |            |
| Acetone  | 0.000415                                   | 0.996449  | 0.9994   | 1.8                     | 36093.2    |
| Methanol | 0.995718                                   | 0.000593  | 0.9994   |                         |            |
| water    | 0.003867                                   | 0.002958  |          |                         |            |

## 2 Capital cost formulas

The diameter of a distillation column is calculated using the *tray sizing* tool in Aspen Plus.

The height of a distillation column is calculated from the equation:

$$H = \frac{N}{e_T} \times 0.6096 \quad N \text{ tray stage except condenser and reboiler, } e_T \text{ tray efficiency is taken as 85\%}$$

for calculating TAC.

The heat transfer areas of the condenser and reboiler are calculated using following equations:

$$A = \frac{Q}{u \times \Delta T} \quad u: \text{overall heat transfer coefficient (kW} \cdot \text{K}^{-1} \cdot \text{m}^{-2}), u=0.852 \text{ for condenser, } 0.568$$

for reboiler.

The capital costs of a distillation column are estimated by the following equations:

$$\text{Shell cost} = \left( \frac{CEPCI}{100} \right) \times 9028 \times D^{1.066} H^{0.802} \times (2.18 + F_C) = 226886 D^{1.066} H^{0.802} \quad \text{Unit of D and H: m}$$

$$\text{Tray cost} = \left( \frac{CEPCI}{100} \right) \times 93.1 \times D^{1.55} H F_C = 1426.0 D^{1.55} H \quad \text{Unit of D and H: m}$$

$$\text{HeatExchanger cost} = \left( \frac{CEPCI}{100} \right) \times 457.4 \times A^{0.65} \times (2.29 + F_C) = 9367.8 A^{0.65} \quad \text{Unit of A: m}^2$$

### 3 Binary parameter of uniquac model

**Table S2. Binary parameters of unquiac model for acetone-methanol with chlorobenzene system**

| Component i<br>Component j | Acetone<br>methanol | Acetone<br>chlorobenzene | Methanol<br>chlorobenzene |
|----------------------------|---------------------|--------------------------|---------------------------|
| A <sub>ij</sub>            | 0                   | -3.2083                  | -0.2317                   |
| A <sub>ji</sub>            | 0                   | 3.9310                   | 1.7617                    |
| B <sub>ij</sub>            | -225.1533           | 1102.0709                | 149.5426                  |
| B <sub>ji</sub>            | 52.7705             | -1388.0554               | -1255.4807                |
